# Supplementary material for: Characterizing the US Population by Patterns of Mobile Health Use for Health and Behavioral Tracking: Analysis of the National Cancer Institute's Health Information National Trends Survey Data
Source: PubMed Central journal article supplement (PMC7256752; doi:10.2196/16299), 2020-05-14
Supplement: jmir_v22i5e16299_app3.pdf [file jmir_v22i5e16299_app3.pdf]

Weighted Population Estimates for Sociodemographic and Health-Related Characteristics, HINTS 5, Cycle 1, 2017 and HINTS 5, Cycle 2, 2018 (N=6,789)

| Characteristic                         | Respondents, n (Weighted %) |
|----------------------------------------|-----------------------------|
| <b>Gender</b>                          |                             |
| Male                                   | 2,564 (49.01)               |
| Female                                 | 3,697 (50.99)               |
| <b>Age (years)</b>                     |                             |
| 18-34                                  | 773 (22.75)                 |
| 35-49                                  | 1,313 (27.67)               |
| 50-64                                  | 2,176 (30.25)               |
| ≥ 65                                   | 2,299 (19.32)               |
| <b>Race and ethnicity</b>              |                             |
| White, non-Hispanic                    | 3,851 (65.23)               |
| Black, non-Hispanic                    | 853 (10.56)                 |
| Hispanic                               | 888 (15.87)                 |
| Other                                  | 512 (8.35)                  |
| <b>Education</b>                       |                             |
| Less than high school                  | 492 (8.83)                  |
| High school graduate                   | 1,247 (22.63)               |
| Technical, vocational, or some college | 1,981 (36.40)               |
| College graduate or postgraduate       | 2,914 (32.14)               |
| <b>Income in US \$</b>                 |                             |
| <20,000                                | 1,238 (17.72)               |
| 20,000-49,999                          | 1,794 (26.19)               |
| 50,000-74,999                          | 1,190 (18.57)               |
| ≥75,000                                | 2,418 (37.52)               |
| <b>Geographical area</b>               |                             |
| Urban                                  | 5,863 (86.07)               |
| Rural                                  | 926 (13.93)                 |
| <b>Perceived health status</b>         |                             |
| Poor                                   | 183 (2.65)                  |
| Fair                                   | 956 (13.25)                 |
| Good                                   | 2,347 (34.54)               |
| Very good                              | 2,449 (36.19)               |
| Excellent                              | 780 (13.37)                 |
| <b>Health self-efficacy</b>            |                             |
| Not confident at all                   | 80 (1.45)                   |
| A little confident                     | 223 (3.50)                  |
| Somewhat confident                     | 1,644 (25.40)               |
| Very confident                         | 3,120 (44.99)               |
| Completely confident                   | 1,643 (24.66)               |
| <b>Health information seeker</b>       |                             |
| Yes                                    | 5,379 (79.68)               |
| No                                     | 1,335 (20.32)               |

| Characteristic                        | Respondents, n (Weighted %) |
|---------------------------------------|-----------------------------|
| <b>BMI (kg/m<sup>2</sup>)</b>         |                             |
| Normal (18.5-24.9)                    | 2,034 (32.44)               |
| Overweight (25-29.9)                  | 2,265 (33.68)               |
| Obese ( $\geq 30$ )                   | 2,169 (33.88)               |
| <b>One or more chronic conditions</b> |                             |
| 0                                     | 3,170 (57.79)               |
| 1                                     | 2,046 (26.99)               |
| 2+                                    | 1,337 (15.22)               |
